# Supplementary material for: Nanomaterials as a Service (NaaS) concept: on-demand protocols for volume synthesis of nanomaterials
Source: Royal Society of Chemistry journal article supplement (doi:10.1039/d4nh00174e), 2024-01-01
Supplement: d4nh00174e1.pdf [file d4nh00174e1.pdf]

## **Supporting information**

### **Nanomaterials as a Service (*NaaS*) concept: on-demand protocols for volume synthesis of nanomaterials**

Stylianos Kioumourtzoglou,<sup>1\*</sup> Sebastian Hof,<sup>1</sup> Cécile Kalk,<sup>1</sup> Viktor Toth,<sup>2</sup> Mikaela Görliin,<sup>3</sup>  
Jaroslava Nováková,<sup>4</sup> and Jacinto Sá<sup>1,5\*</sup>

<sup>1</sup> Department of Chemistry-Ångström, Physical-Chemistry division, Uppsala University, Lägerhyddsvägen 1, 751 20 Uppsala, Sweden.

<sup>2</sup> Toptal, LLC, 2810 N. Church St #36879, Wilmington, DE 19802-4447, USA.

<sup>3</sup> Department of Chemistry-Ångström, Structural Chemistry division, Uppsala University, Lägerhyddsvägen 1, 751 20 Uppsala, Sweden.

<sup>4</sup> Department of Surface and Plasma Science, Charles University, V holesovickach 2, Prague 8, 18000, Czech Republic

<sup>5</sup> Institute of Physical Chemistry, Polish Academy of Sciences, Marcina Kasprzaka 44/52, 01-224 Warsaw, Poland.

\* stylianos.kioumourtzoglou@kemi.uu.se; jacinto.sa@kemi.uu.se

### Additional data

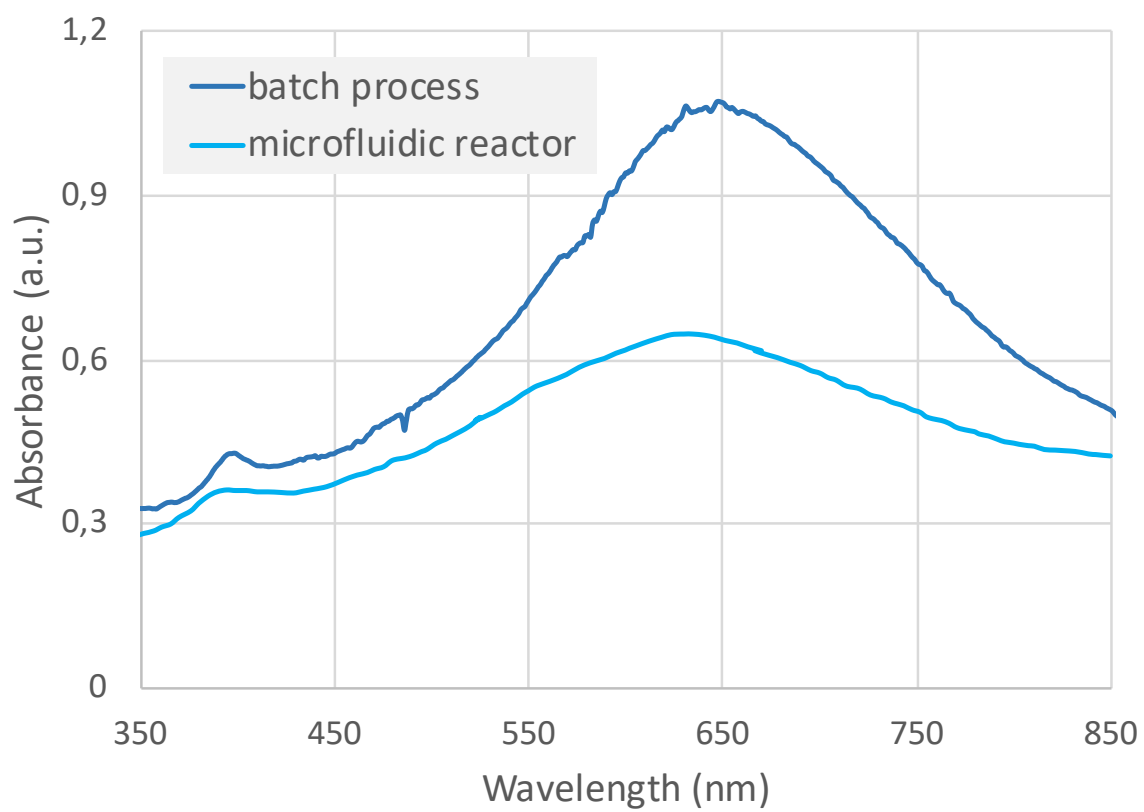

**Figure S1:** UV-Vis spectra comparing the of Ag nanoplates produced using batch method and optimized protocol in the microfluidic reactor.

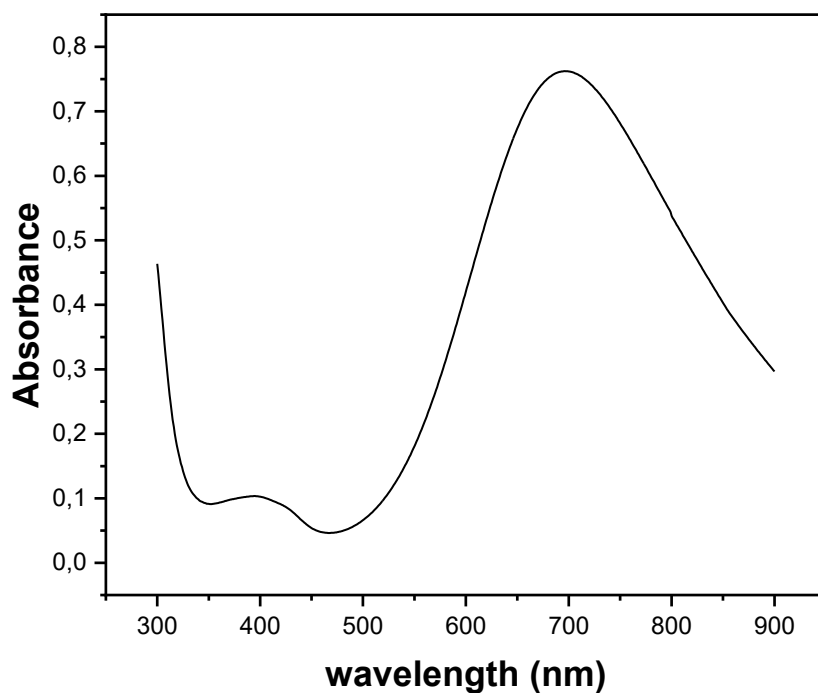

**Figure S2:** UV-Vis spectrum of Prussian blue nanoparticles produced with optimized protocol.

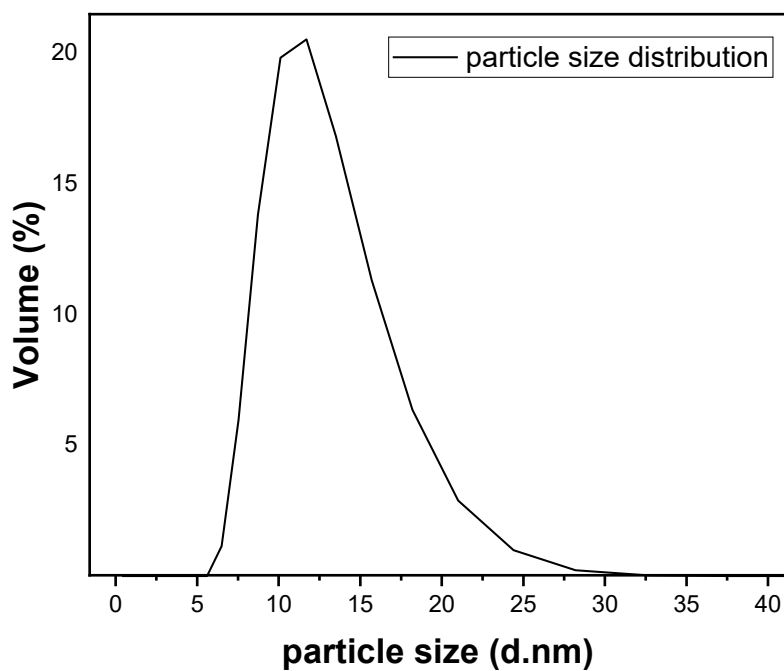

**Figure S3:** DLS of Prussian blue nanoparticles produced with optimized protocol in the microfluidic reactor.

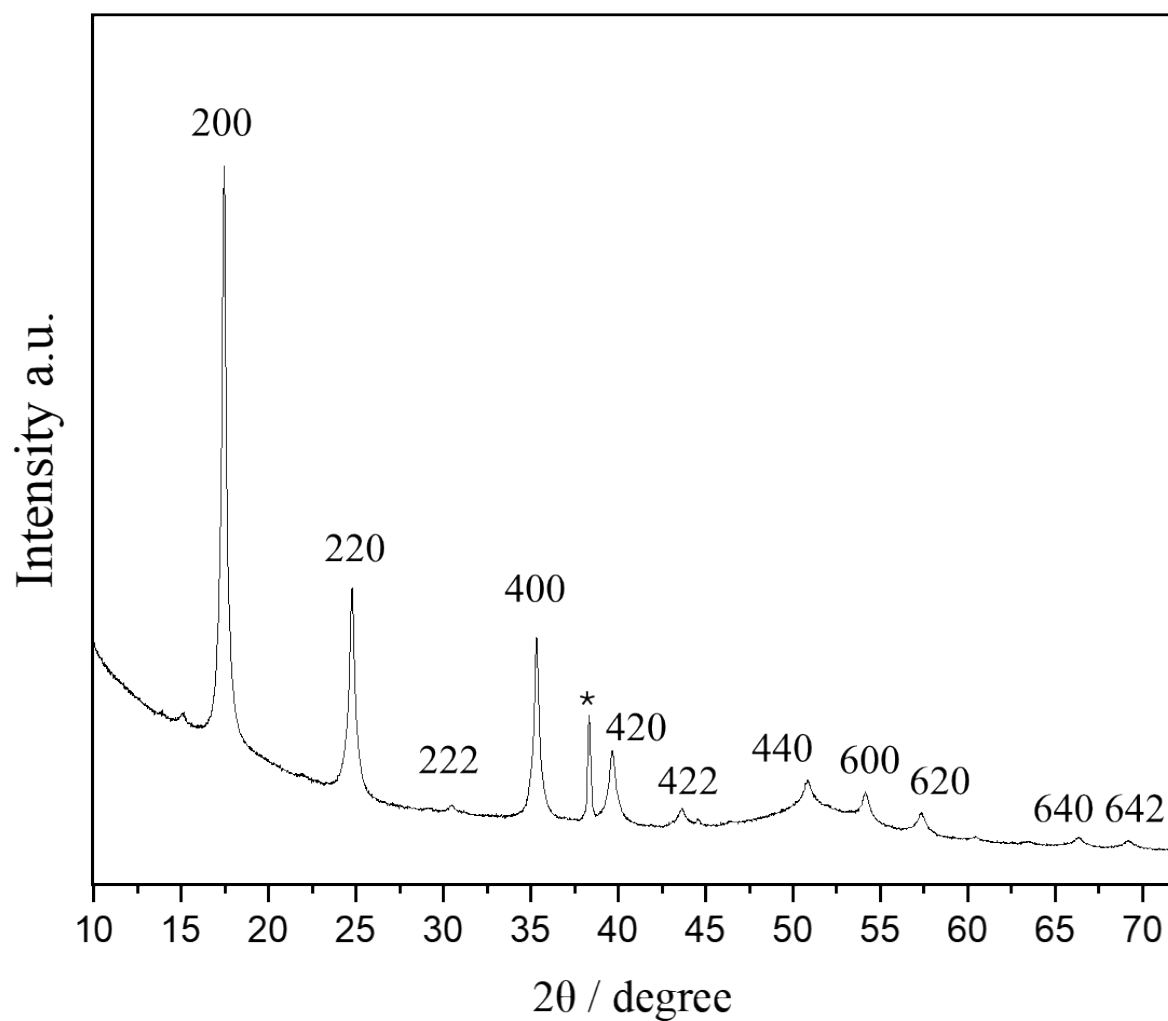

**Figure S4:** XRD of the Prussian blue nanoparticles produced with optimized protocol in the microfluidic reactor.

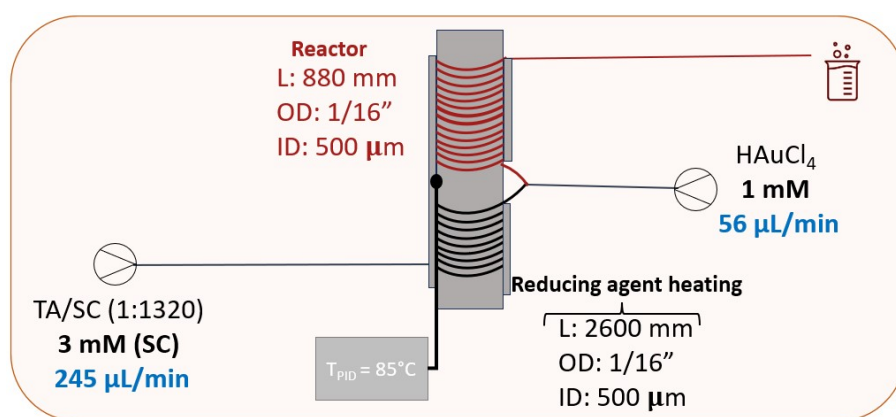

**Figure S5:** Schematic depiction of the microfluidic reactor including heating device for the Au NPs synthesis.

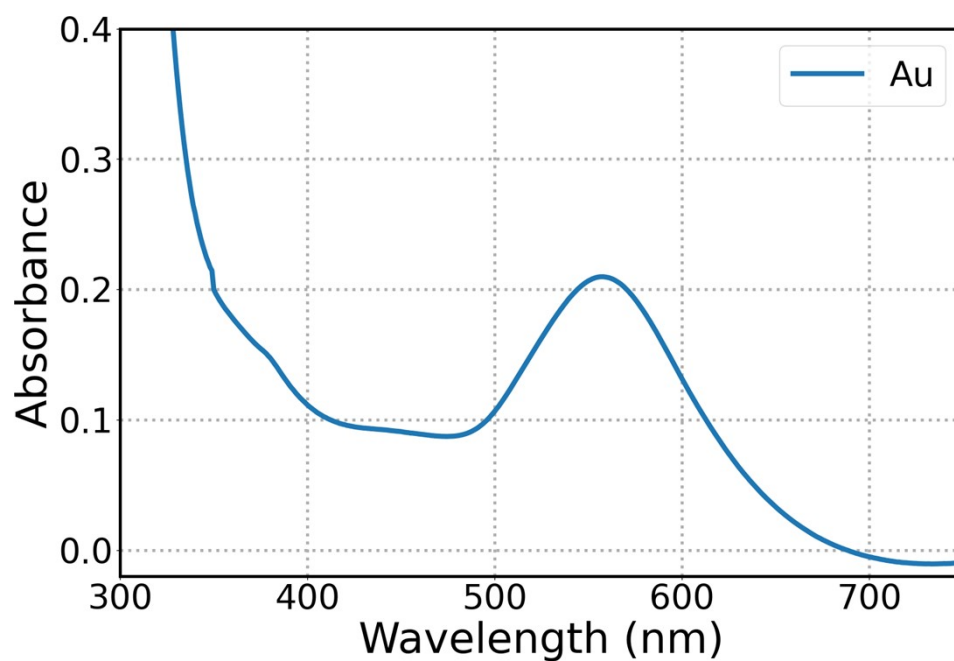

**Figure S6:** UV-Vis of Au nanoparticles optimized protocol in the microfluidic reactor.

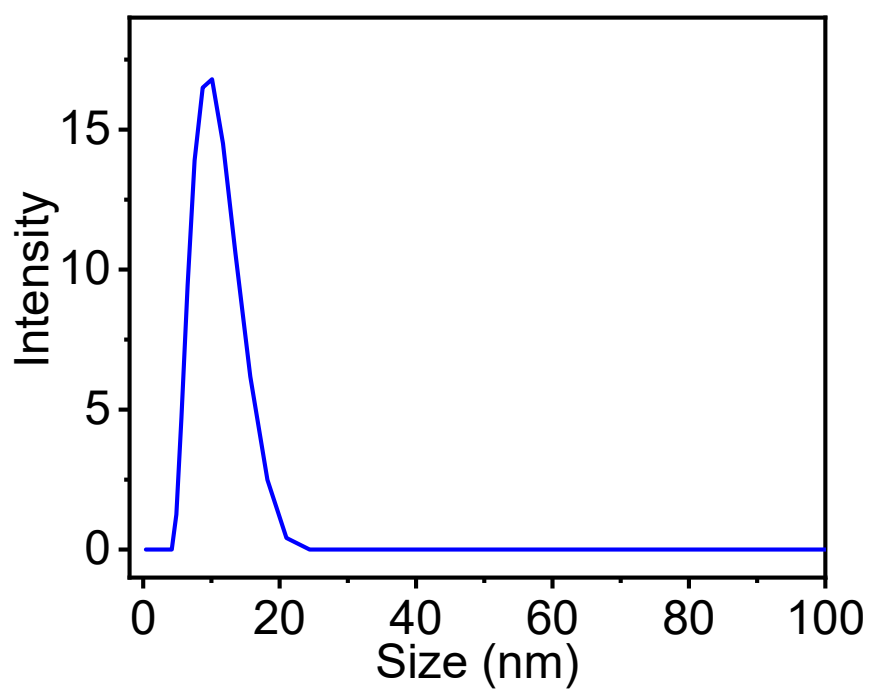

**Figure S7:** DLS of Au nanoparticles optimized protocol in the microfluidic reactor.
